# Supplementary material for: Characterization of a Dengue Virus Serotype 1 Isolated from a Patient in Ciudad Juarez, Mexico
Source: MDPI journal article supplement (doi:10.3390/pathogens10070872), 2021-07-10
Supplement: s1 [file s1]

**Table S1.** DENV strains for phylogenetic analysis. Strain names, accession numbers, and country and year of collection are included.

| Tree Name                             | Collection Year | Collection Location | Strain Name          | GenBank Accession |
|---------------------------------------|-----------------|---------------------|----------------------|-------------------|
| DENV1_Brazil_1990_Den1BR-90           | 1990            | Brazil              | Den1BR-90            | AF226685.2        |
| DENV1_Brazil_2010_13861-BR-PE-10      | 2010            | Brazil              | 13861-BR-PE-10       | JX669465.1        |
| DENV1_Brazil_2014_SJRP-2271           | 2014            | Brazil              | SJRP-2271            | KP188568.1        |
| DENV1_China_2015_GZ-11                | 2015            | China               | GZ-11                | KX225492.1        |
| DENV1_Colombia_1998_BID-V3377         | 1998            | Colombia            | BID-V3377            | GQ868560.1        |
| DENV1_Colombia_1998_BID-V7290         | 1998            | Colombia            | BID-V7290            | KJ189302.1        |
| DENV1_Ecuador_2014_TD-00061-P         | 2014            | Ecuador             | TD-00061-P           | KY474307.1        |
| DENV1_Florida_2010_BOL-KW010          | 2010            | Florida             | BOL-KW010            | JQ675358.1        |
| DENV1_France_2014_Toulon-CNR-25329    | 2014            | France              | Toulon-CNR-25329     | MF004384.1        |
| DENV1_FrenchPolynesia_2001_BID-V2939  | 2001            | French Polynesia    | BID-V2939            | FJ898448.1        |
| DENV1_Gabon_2012_Gabon2012            | 2012            | Gabon               | Gabon2012            | MG877557.1        |
| DENV1_Hawaii_2001_Haw03663            | 2001            | Hawaii              | Haw03663             | DQ672564.1        |
| DENV1_India_1971_715393               | 1971            | India               | 715393               | JQ922546.1        |
| DENV1_Japan_1943_Mochizuki            | 1943            | Japan               | Mochizuki            | AB074760.1        |
| DENV1_Malaysia_1972_P72-1244          | 1972            | Malaysia            | P72-1244             | EF457905.1        |
| DENV1_Mexico_2006_BID-V3658           | 2006            | Mexico              | BID_V3658            | GU131958.1        |
| DENV1_Mexico_2007_BID-V3673           | 2007            | Mexico              | BID-V3673            | GU131964.1        |
| DENV1_Mexico_2007_BID-V3679           | 2007            | Mexico              | BID-V3679            | GU131966.1        |
| DENV1_Mexico_2007_BID-V3709           | 2007            | Mexico              | BID-V3709            | GQ868513.1        |
| DENV1_Mexico_2007_BID-V3727           | 2007            | Mexico              | BID-V3727            | GQ868521.1        |
| DENV1_Mexico_2007_BID-V3739           | 2007            | Mexico              | BID-V3739            | GQ868527.1        |
| DENV1_Mexico_2007_BID-V7572           | 2007            | Mexico              | BID-V7572            | KJ189317.1        |
| DENV1_Mexico_2007_BID-V7589           | 2007            | Mexico              | BID-V7589            | KJ189323.1        |
| DENV1_Mexico_2007_BID-V7590           | 2007            | Mexico              | BID-V7590            | KJ189324.1        |
| DENV1_Mexico_2008_BID-V3758           | 2008            | Mexico              | BID-V3758            | GQ868537.1        |
| DENV1_Mexico_2011_BID-V7298           | 2011            | Mexico              | BID-V7298            | KJ189306.1        |
| DENV1_Mexico_2011_BID-V7624           | 2011            | Mexico              | BID-V7624            | KJ189348.1        |
| DENV1_Mexico_2011_BID-V7625           | 2011            | Mexico              | BID-V7625            | KJ189349.1        |
| DENV1_Mexico_2012_BID-V8195           | 2012            | Mexico              | BID-V8195            | KJ189368.1        |
| <b>DENV1_Mexico_2015_CiudadJuarez</b> | <b>2015</b>     | <b>Mexico</b>       | <b>Ciudad Juarez</b> | <b>MZ3432597</b>  |
| DENV1_Nicaragua_2004_BID-V653         | 2004            | Nicaragua           | BID-V653             | EU596501.1        |
| DENV1_Nicaragua_2004_BID-V664         | 2004            | Nicaragua           | BID-V664             | GQ199873.1        |
| DENV1_Nicaragua_2005_BID-V1071        | 2005            | Nicaragua           | BID-V1071            | EU482617.1        |
| DENV1_Nicaragua_2005_BID-V534         | 2005            | Nicaragua           | BID-V534             | JN819402.1        |
| DENV1_Nicaragua_2005_BID-V536         | 2005            | Nicaragua           | BID-V536             | FJ850113.1        |
| DENV1_Nicaragua_2005_BID-V606         | 2005            | Nicaragua           | BID-V606             | EU596504.1        |
| DENV1_Nicaragua_2005_BID-V621         | 2005            | Nicaragua           | BID-V621             | FJ410290.1        |

|                                       |      |                  |              |            |
|---------------------------------------|------|------------------|--------------|------------|
| DENV1_Nicaragua_2005_BID-V629         | 2005 | Nicaragua        | BID-V629     | FJ024485.1 |
| DENV1_Nicaragua_2006_BID-V746         | 2006 | Nicaragua        | BID-V746     | JN819403.1 |
| DENV1_Nicaragua_2007_BID-V1223        | 2007 | Nicaragua        | BID-V1223    | FJ898433.1 |
| DENV1_Nicaragua_2008_BID-V2652        | 2008 | Nicaragua        | BID-V2652    | GQ199859.1 |
| DENV1_Nicaragua_2009_BID-V5504        | 2009 | Nicaragua        | BID-V5504    | JF937635.1 |
| DENV1_Nicaragua_2011_BID-V7672        | 2011 | Nicaragua        | BID-V7672    | KF973460.1 |
| DENV1_Nicaragua_2012_BID-V7651        | 2012 | Nicaragua        | BID-V7651    | KF973456.1 |
| DENV1_Nicaragua_2012_BID-V7655        | 2012 | Nicaragua        | BID-V7655    | KF973458.1 |
| DENV1_Nicaragua_2012_BID-V7690        | 2012 | Nicaragua        | BID-V7690    | KF973472.1 |
| DENV1_Nicaragua_2012_BID-V7691        | 2012 | Nicaragua        | BID-V7691    | KF973473.1 |
| DENV1_Nicaragua_2012_BID-V7692        | 2012 | Nicaragua        | BID-V7692    | KF973474.1 |
| DENV1_Nicaragua_2012_BID-V7696        | 2012 | Nicaragua        | BID-V7696    | KF973475.1 |
| DENV1_PuertoRico_1986_BID-V2097       | 1986 | Puerto Rico      | BID-V2097    | FJ562106.1 |
| DENV1_PuertoRico_1992_BID-V2136       | 1992 | Puerto Rico      | BID-V2136    | FJ410186.1 |
| DENV1_PuertoRico_1993_BID-V2134       | 1993 | Puerto Rico      | BID-V2134    | FJ410185.1 |
| DENV1_PuertoRico_1994_BID-V2127       | 1994 | Puerto Rico      | BID-V2127    | FJ410179.1 |
| DENV1_PuertoRico_1995_BID-V1744       | 1995 | Puerto Rico      | BID-V1744    | FJ205875.1 |
| DENV1_PuertoRico_1996_BID-V2138       | 1996 | Puerto Rico      | BID-V2138    | FJ478457.1 |
| DENV1_PuertoRico_2006_BID-V852        | 2006 | Puerto Rico      | BID-V852     | EU482591.1 |
| DENV1_PuertoRico_2012_BID-V7719       | 2012 | Puerto Rico      | BID-V7719    | KJ189359.1 |
| DENV1_Thailand_1960_606147            | 1960 | Thailand         | 606147       | JQ922547.1 |
| DENV1_Thailand_1982_ThD1-0081-82      | 1982 | Thailand         | ThD1-0081-82 | AY732481.1 |
| DENV1_Venezuela_1997_BID-V2162        | 1997 | Venezuela        | BID-V2162    | FJ639735.1 |
| DENV1_Venezuela_1998_BID-V2168        | 1998 | Venezuela        | BID-V2168    | FJ639740.1 |
| DENV1_Venezuela_1998_BID-V2169        | 1998 | Venezuela        | BID-V2169    | FJ639741.1 |
| DENV1_Venezuela_1999_BID-V2171        | 1999 | Venezuela        | BID-V2171    | FJ639743.1 |
| DENV1_Venezuela_2000_BID-V3549        | 2000 | Venezuela        | BID-V3549    | GU131833.1 |
| DENV1_Venezuela_2004_BID-V2423        | 2004 | Venezuela        | BID-V2423    | JN819425.1 |
| DENV1_Venezuela_2006_VE-61006         | 2006 | Venezuela        | VE-61006     | HQ332182.1 |
| DENV1_Venezuela_2007_BID-V1134        | 2007 | Venezuela        | BID-V1134    | EU482609.1 |
| DENV1_Venezuela_2007_VE-61081         | 2007 | Venezuela        | VE-61081     | HQ332183.1 |
| DENV1_Venezuela_2008_BID-V2469        | 2008 | Venezuela        | BID-V2469    | FJ850104.1 |
| DENV2_PapuaNewGuinea_1944_NewGuinea C | 1944 | Papua New Guinea | New Guinea C | KM204118.1 |
